# Supplementary material for: RNA-seq transcriptome profiling of porcine lung from two pig breeds in response to Mycoplasma hyopneumoniae infection
Source: PeerJ. 2019 Oct 21;7:e7900. doi: 10.7717/peerj.7900 (PMC6812673; doi:10.7717/peerj.7900)
Supplement: Dataset S1 [file peerj-07-7900-s008.xlsx]

## Sheet: Sheet1
Body weight and Mhp-specific antibody levels of experimental pigs
groups	sample	Body weight (kg)		weight gain (kg)	Daily weight gain(g)	Antibody levels（s/p）
		Day 0	Day 28			0 d	28d
Jiangquhai infection	JI1	9.3	12.5	3.2	114.29	0.071875	1.05585
	JI2	8.5	12	3.5	125	0.0234375	0.959532
	JI3	9.3	12.9	3.6	128.57	0.0878906	0.91806
	JI4	8	11.8	3.8	135.71	0.078125	0.791639
	JI5	7.9	11.9	4	142.86	0.0234375	0.608646
	JI6	9.1	12.3	3.2	114.29	0.0195312	1.24749
	JI7	8.8	12.5	3.7	132.14	0.0430469	0.773579
	JI8	9.3	13.2	3.9	139.29	0.0234375	0.69398
	JI9	7	11.6	4.6	164.29	0.0880469	0.608696
	JI10	8.2	11.9	3.7	132.14	0.03125	0.849833
Jiangquhai control	JC1	9	15.6	6.6	235.71	0.0136719	0.0518395
	JC2	8.4	16.2	7.8	278.57	0.0410156	0.123746
	JC3	8.2	16.1	7.9	282.14	0.0566406	0.175585
	JC4	8.7	15.5	6.8	242.86	0.0890625	0.215719
	JC5	8.5	15.5	7	250	0.0195312	0.102341
	JC6	9.3	16	6.7	239.29	0.0217391	0.0217391
	JC7	8.1	14.8	6.7	239.29	0.0936455	0.0150502
	JC8	8.1	14.3	6.2	221.43	0.0839799	0.0100334
	JC9	8.7	14.9	6.2	221.43	0.10893	0.0250167
	JC10	7.55	14	6.45	230.36	0.0167224	0.0283612
Duroc infection	DI1	11.5	18.6	7.1	253.57	0.0201	0.782609
	DI2	11.5	18.9	7.4	264.29	0.00585937	0.608696
	DI3	9.9	17.5	7.6	271.43	0.0351562	0.547492
	DI4	10.5	19.2	8.7	310.71	0.0273438	0.219064
	DI5	11.1	18.6	7.5	267.86	0.0292969	0.338462
	DI6	10	18.5	8.5	303.57	0.0175	0.413712
	DI7	11.5	18.2	6.7	239.29	0.0253906	0.751505
	DI8	9.5	18.2	8.7	310.71	0.0223	0.327759
	DI9	11.3	18.5	7.2	257.14	0.0286	0.459197
	DI10	9.6	17.9	8.3	296.43	0.0136719	0.349164
Duroc control	DC1	10.6	19.2	8.6	307.14	0.0273438	0.0334448
	DC2	10.9	19.6	8.7	310.71	0.0273438	0.0334448
	DC3	10.9	19.1	8.2	292.86	0.0332031	0.0384615
	DC4	10.3	18.1	7.8	278.57	0.0175781	0.0434783
	DC5	10.8	18.6	7.8	278.57	0.0214844	0.0767224
	DC6	9.5	17.8	8.3	296.43	0.0234783	0.0267559
	DC7	9.3	18.5	9.2	328.57	0.0384615	0.046689
	DC8	11.3	19.5	8.2	292.86	0.011806	0.0351171
	DC9	11.5	18.9	7.4	264.29	0.011806	0.0301003
	DC10	10.15	18.8	8.65	308.93	0.00501672	0.0439531
