# Supplementary material for: RNA-seq transcriptome profiling of porcine lung from two pig breeds in response to Mycoplasma hyopneumoniae infection
Source: PeerJ. 2019 Oct 21;7:e7900. doi: 10.7717/peerj.7900 (PMC6812673; doi:10.7717/peerj.7900)
Supplement: Dataset S2 [file peerj-07-7900-s009.xlsx]

## Sheet: Sheet1
		The scoring system for recording pulmonary MPS lesions
		Lesions were allocated to each apical and cardiac lobe(%)			Interrelation between lung lesion score and gross lesion
		Left apical	10		Lung lesion score	Gross lesion (%)
		Right apical	10		0	0
		Left cardiac	10		1	1∼10
		Right cardiac	10		2	11∼20
		Left diaphragmatic	25		3	21∼30
		Right diaphragmatic	25		4	31∼40
		tertiary	10		5	41
Raw data for Lung lesion score (The Lung lesion score were confirmed and scored by two trained veterinarian)
groups	sample	Left apical(%)	Right apical(%)	Left cardiac(%)	Right cardiac(%)	Left diaphragmatic(%)	Right diaphragmatic(%)	tertiary(%)	Gross lesion (%)	Lung lesion score
Jiangquhai infection	JI1	8	8	6	6	6	6	7	47	5
	JI1	7	8	7	7	5	6	7	47	5
	JI2	7	7	7	7	5	8	7	48	5
	JI2	6	7	7	7	5	8	8	48	5
	JI3	5	6	6	7	6	6	3	39	4
	JI3	5	5	5	6	7	7	3	38	4
	JI4	5	5	5	5	3	3	2	28	3
	JI4	5	6	5	6	4	3	3	32	4
	JI5	6	6	6	7	4	4	5	38	4
	JI5	6	6	6	7	4	4	5	38	4
	JI6	8	7	7	6	6	7	8	49	5
	JI6	8	7	7	6	6	7	8	49	5
	JI7	7	7	6	6	5	6	4	41	5
	JI7	7	7	6	6	5	5	4	40	5
	JI8	6	6	5	5	4	4	2	32	4
	JI8	7	6	5	6	4	4	3	35	4
	JI9	4	3	4	4	0	1	3	19	2
	JI9	4	4	4	4	0	1	4	21	3
	JI10	7	6	7	7	3	4	4	38	4
	JI10	7	6	6	6	4	3	5	37	4
Duroc infection	DI1	3	3	4	3	1	0	3	17	2
	DI1	3	3	4	2	1	1	3	17	2
	DI2	2	2	3	3	0	1	2	13	2
	DI2	2	2	3	2	0	1	2	12	2
	DI3	3	3	2	2	1	0	1	12	2
	DI3	3	3	2	2	1	0	1	12	2
	DI4	2	1	1	1	0	0	1	6	1
	DI4	2	1	1	1	0	0	1	6	1
	DI5	3	3	2	3	1	0	1	13	2
	DI5	3	3	2	3	0	0	1	12	2
	DI6	3	2	2	1	0	0	1	9	1
	DI6	3	2	2	1	0	0	1	9	1
	DI7	5	4	4	3	1	1	3	21	3
	DI7	5	4	4	3	1	1	3	21	3
	DI8	2	2	2	3	1	0	2	12	2
	DI8	2	3	2	2	1	0	2	12	2
	DI9	4	4	5	4	0	0	2	19	2
	DI9	4	4	5	4	0	0	2	19	2
	DI10	3	2	3	3	1	0	2	14	2
	DI10	3	2	3	2	1	1	2	14	2
