# Supplementary material for: RNA-seq transcriptome profiling of porcine lung from two pig breeds in response to Mycoplasma hyopneumoniae infection
Source: PeerJ. 2019 Oct 21;7:e7900. doi: 10.7717/peerj.7900 (PMC6812673; doi:10.7717/peerj.7900)
Supplement: Dataset S3 [file peerj-07-7900-s010.xlsx]

## Sheet: Sheet1
Raw data for the RT-qPCR of DEGs
Sample Name	Target gene Name	GAPDH/CT	Target gene /CT
JI2	CCL8	13.1944	25.64
JI3	CCL8	13.538	25.84
JI10	CCL8	12.7624	25.1768
JI4	CCL8	13.815	26.0733
JI7	CCL8	12.437	24.801
JI8	CCL8	13.8875	26.1635
JC2	CCL8	13.818	24.5192
JC6	CCL8	12.9734	23.8562
JC8	CCL8	12.456	23.2173
JC1	CCL8	14.0165	24.2196
JC4	CCL8	13.616	24.3105
JC5	CCL8	12.2129	23.3896
DI2	CCL8	12.1145	24.5596
DI5	CCL8	12.9112	25.5229
DI6	CCL8	13.8013	26.2866
DI4	CCL8	12.5173	24.9552
DI8	CCL8	13.8832	26.4723
DI9	CCL8	13.9608	27.1206
DC1	CCL8	13.2976	24.0299
DC4	CCL8	13.1322	23.8466
DC5	CCL8	12.6412	23.2398
DC2	CCL8	12.0745	23.4802
DC7	CCL8	12.3606	23.1571
DC6	CCL8	12.0686	23.0677
JI2	CXCL8	13.1944	27.8753
JI3	CXCL8	13.538	27.9029
JI10	CXCL8	12.7624	27.0225
JI4	CXCL8	13.815	27.8308
JI7	CXCL8	12.437	26.2512
JI8	CXCL8	13.8875	27.1246
JC2	CXCL8	13.818	24.8598
JC6	CXCL8	12.9734	24.1737
JC8	CXCL8	12.456	23.6708
JC1	CXCL8	14.0165	25.1618
JC4	CXCL8	13.616	24.6279
JC5	CXCL8	12.2129	23.2504
DI2	CXCL8	12.1145	26.5533
DI5	CXCL8	12.9112	27.2321
DI6	CXCL8	13.8013	27.955
DI4	CXCL8	12.5173	26.4403
DI8	CXCL8	13.8832	28.2289
DI9	CXCL8	13.9608	27.1472
DC1	CXCL8	13.2976	24.3253
DC4	CXCL8	13.1322	24.3154
DC5	CXCL8	12.6412	24.0475
DC2	CXCL8	12.0745	23.7723
DC7	CXCL8	12.3606	23.2256
DC6	CXCL8	12.0686	23.5233
JI2	CCR10	13.1944	27.022
JI3	CCR10	13.538	27.1047
JI10	CCR10	12.7624	26.6039
JI4	CCR10	13.815	27.5538
JI7	CCR10	12.437	26.243
JI8	CCR10	13.8875	27.1005
JC2	CCR10	13.818	25.5404
JC6	CCR10	12.9734	24.3957
JC8	CCR10	12.456	23.5781
JC1	CCR10	14.0165	25.2033
JC4	CCR10	13.616	25.1876
JC5	CCR10	12.2129	23.8403
DI2	CCR10	12.1145	25.4033
DI5	CCR10	12.9112	26.0202
DI6	CCR10	13.8013	26.5839
DI4	CCR10	12.5173	25.6899
DI8	CCR10	13.8832	26.6777
DI9	CCR10	13.9608	27.1267
DC1	CCR10	13.2976	24.3487
DC4	CCR10	13.1322	24.3487
DC5	CCR10	12.6412	23.7343
DC2	CCR10	12.0745	23.5181
DC7	CCR10	12.3606	24.0022
DC6	CCR10	12.0686	23.1572
JI2	NCF1	13.1944	28.0735
JI3	NCF1	13.538	27.9326
JI10	NCF1	12.7624	27.9332
JI4	NCF1	13.815	27.6135
JI7	NCF1	12.437	27.5002
JI8	NCF1	13.8875	27.1363
JC2	NCF1	13.818	26.5688
JC6	NCF1	12.9734	25.3569
JC8	NCF1	12.456	25.6246
JC1	NCF1	14.0165	26.8612
JC4	NCF1	13.616	26.5908
JC5	NCF1	12.2129	24.6584
DI2	NCF1	12.1145	28.2641
DI5	NCF1	12.9112	27.2535
DI6	NCF1	13.8013	29.0832
DI4	NCF1	12.5173	26.2428
DI8	NCF1	13.8832	27.4507
DI9	NCF1	13.9608	28.2216
DC1	NCF1	13.2976	25.9523
DC4	NCF1	13.1322	25.8635
DC5	NCF1	12.6412	26.2723
DC2	NCF1	12.0745	25.003
DC7	NCF1	12.3606	25.5894
DC6	NCF1	12.0686	25.0395
JI2	VAV1	13.1944	27.0286
JI3	VAV1	13.538	26.6917
JI10	VAV1	12.7624	26.6619
JI4	VAV1	13.815	27.8008
JI7	VAV1	12.437	25.5974
JI8	VAV1	13.8875	27.3596
JC2	VAV1	13.818	25.8839
JC6	VAV1	12.9734	25.4435
JC8	VAV1	12.456	24.8686
JC1	VAV1	14.0165	26.3522
JC4	VAV1	13.616	25.7754
JC5	VAV1	12.2129	24.375
DI2	VAV1	12.1145	26.4623
DI5	VAV1	12.9112	26.999
DI6	VAV1	13.8013	27.7997
DI4	VAV1	12.5173	26.3001
DI8	VAV1	13.8832	27.5843
DI9	VAV1	13.9608	27.4827
DC1	VAV1	13.2976	26.0016
DC4	VAV1	13.1322	25.0235
DC5	VAV1	12.6412	25.0991
DC2	VAV1	12.0745	24.2546
DC7	VAV1	12.3606	24.6723
DC6	VAV1	12.0686	24.5545
JI2	PPBP	13.1944	25.4532
JI3	PPBP	13.538	24.9701
JI10	PPBP	12.7624	24.5907
JI4	PPBP	13.815	25.4182
JI7	PPBP	12.437	24.6868
JI8	PPBP	13.8875	25.1487
JC2	PPBP	13.818	27.0309
JC6	PPBP	12.9734	26.9693
JC8	PPBP	12.456	26.0021
JC1	PPBP	14.0165	27.6187
JC4	PPBP	13.616	27.2327
JC5	PPBP	12.2129	25.7273
DI2	PPBP	12.1145	23.9068
DI5	PPBP	12.9112	24.7166
DI6	PPBP	13.8013	25.9083
DI4	PPBP	12.5173	24.1772
DI8	PPBP	13.8832	25.4591
DI9	PPBP	13.9608	25.6321
DC1	PPBP	13.2976	27.0343
DC4	PPBP	13.1322	26.7976
DC5	PPBP	12.6412	26.7105
DC2	PPBP	12.0745	25.2623
DC7	PPBP	12.3606	25.1903
DC6	PPBP	12.0686	25.0306
JI2	FIGF	13.1944	25.5793
JI3	FIGF	13.538	25.5809
JI10	FIGF	12.7624	24.5379
JI4	FIGF	13.815	25.2355
JI7	FIGF	12.437	24.124
JI8	FIGF	13.8875	25.8743
JC2	FIGF	13.818	26.7582
JC6	FIGF	12.9734	25.5623
JC8	FIGF	12.456	25.5291
JC1	FIGF	14.0165	26.6448
JC4	FIGF	13.616	26.5765
JC5	FIGF	12.2129	25.8216
DI2	FIGF	12.1145	23.6899
DI5	FIGF	12.9112	24.9523
DI6	FIGF	13.8013	25.431
DI4	FIGF	12.5173	24.5592
DI8	FIGF	13.8832	25.5748
DI9	FIGF	13.9608	25.7796
DC1	FIGF	13.2976	26.7675
DC4	FIGF	13.1322	25.7762
DC5	FIGF	12.6412	26.1665
DC2	FIGF	12.0745	25.5083
DC7	FIGF	12.3606	25.8701
DC6	FIGF	12.0686	24.7742
JI2	KIT	13.1944	25.1106
JI3	KIT	13.538	25.3559
JI10	KIT	12.7624	24.9338
JI4	KIT	13.815	25.4866
JI7	KIT	12.437	24.1788
JI8	KIT	13.8875	25.8401
JC2	KIT	13.818	26.8965
JC6	KIT	12.9734	26.2576
JC8	KIT	12.456	24.9681
JC1	KIT	14.0165	27.2329
JC4	KIT	13.616	26.3552
JC5	KIT	12.2129	24.7613
DI2	KIT	12.1145	24.2437
DI5	KIT	12.9112	24.8769
DI6	KIT	13.8013	25.6984
DI4	KIT	12.5173	24.1778
DI8	KIT	13.8832	25.5361
DI9	KIT	13.9608	25.7735
DC1	KIT	13.2976	26.3838
DC4	KIT	13.1322	26.3436
DC5	KIT	12.6412	26.0749
DC2	KIT	12.0745	25.2091
DC7	KIT	12.3606	25.1781
DC6	KIT	12.0686	24.6306
